# Supplementary material for: A series of lanthanide–organic polymers incorporating nitrogen-heterocyclic and aliphatic carboxylate mixed-ligands: structures, luminescent and magnetic properties
Source: Royal Society of Chemistry journal article supplement (doi:10.1039/c0dt00333f), 2010-01-01
Supplement: c0dt00333f.pdf [file c0dt00333f.pdf]

Electronic Supplementary Information for Dalton Transactions

## Electronic Supplementary Information for

### A series of lanthanide–organic polymers incorporating nitrogen-heterocyclic and aliphatic dicarboxylate mixed –ligands: structures, luminescent and magnetic properties

Xun Feng, Bin Liu, Li-Ya Wang<sup>\*</sup>, Jian-She Zhao<sup>\*</sup>,  
Jian Ge Wang, Ng Seik Weng and Xin-Ge Shi

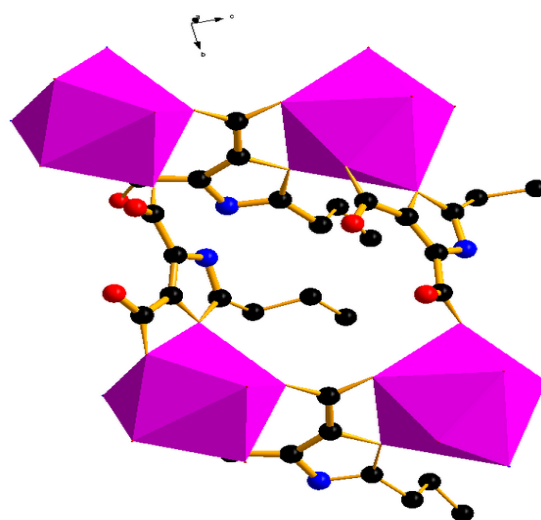

(a)

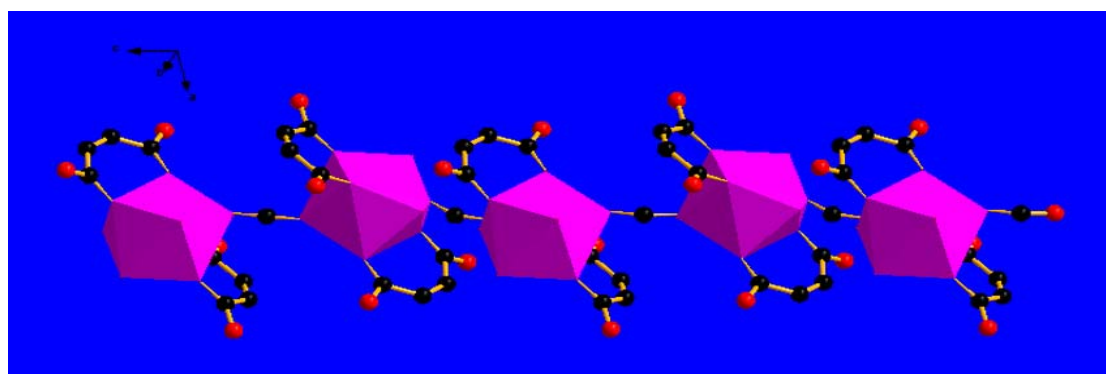

(b)

**Figure S1.** (a) Illustration of an individual  $\text{Sm}_4$  square lattice motifs linked by the Hpimda ligands viewed approximately down the  $ac$ -plane in **1**. (b) Polyhedral view of the  $\text{Sm}(2)$  ions linked by the formate groups to produce an 1D infinite chain.

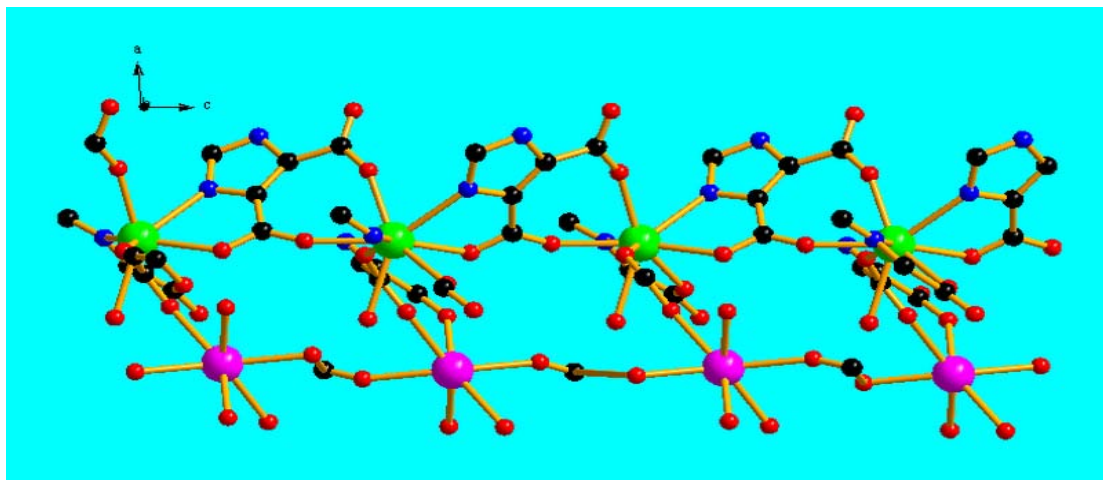

**Figure S2.** Projective view of the 1D double chain in **1** constructed by the pimda ligand.  
(Sm (1) green ball, Sm(2) pink ball)

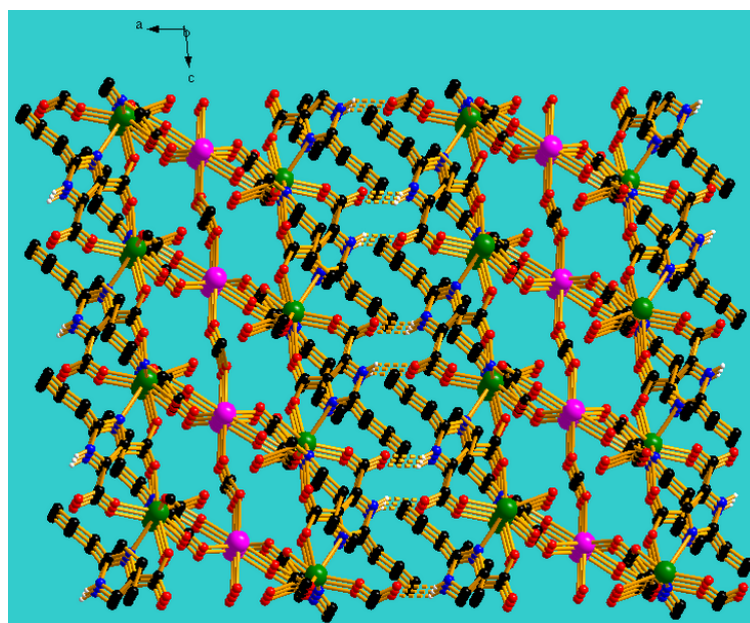

**Figure S3** Side view of the 3D packing diagram of **1** interconnected by the hydrogen bonding interaction along *a* axis. Non hydrogen bonding hydrogen atoms and free water molecules have been omitted for clarity.

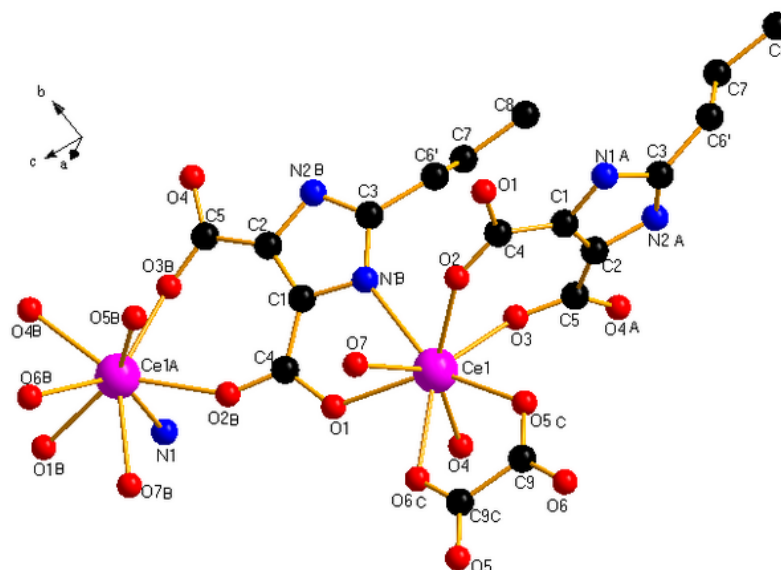

**Figure S4.** Coordination environments of the Ce(III) ions in complex **6** with the atoms labeling scheme. Symmetry codes follow: A:  $x, -y+1/2, z-1/2$ . B:  $-x+1, y+1/2, -z+1/2$ . C:  $-1+x, -y+1/2, z-1/2$ . D:  $x+1, -y, -z$ .

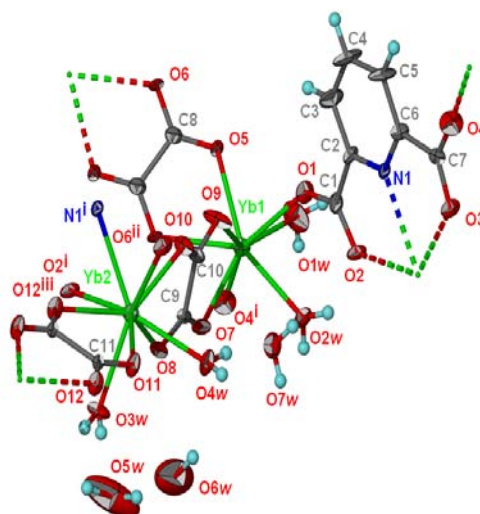

**Figure S5.** Coordination environments of the Yb(III) ions in complex **7** with the atoms labeling scheme. Symmetry codes follow: #1  $x+1, y+1, z$ ; #2  $-x+1, -y+2, -z$ ; #3  $x+1, y, z$ .

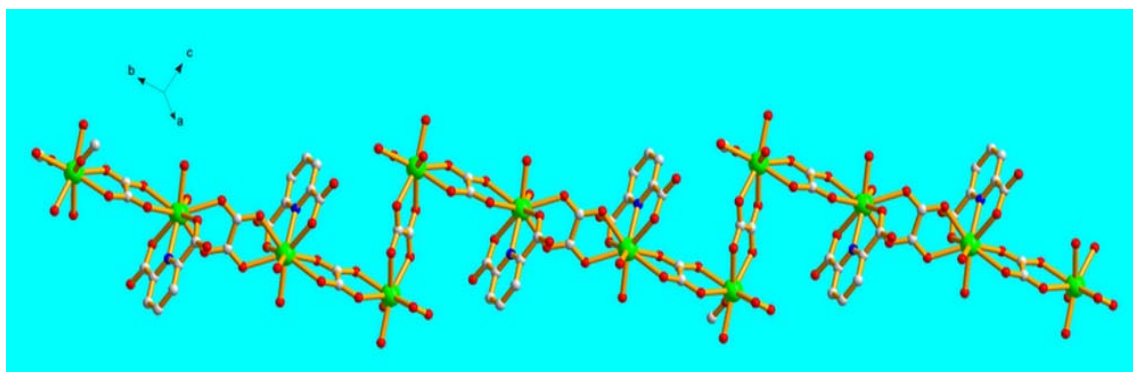

**Figure S6.** Ball-and-stick representation of the Yb(III) ions linked by the oxalate ligands resulting in an infinite zigzag alternate chain in the complex **7**

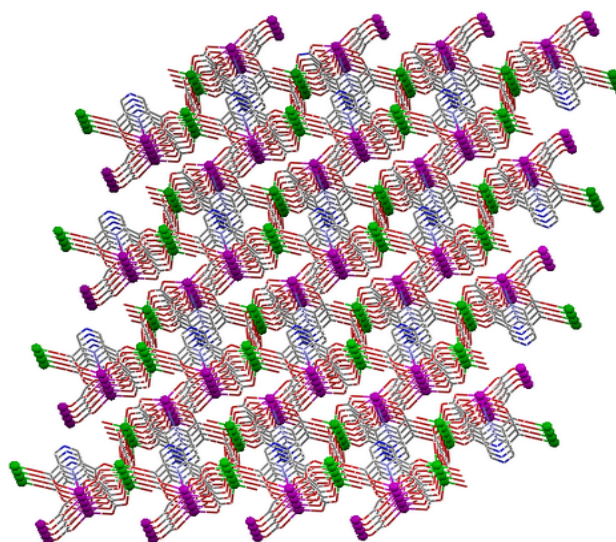

**Figure S7** The 3D packing diagram of **7** viewed along the *a b* plane. The guest water molecules have been omitted for clarity.

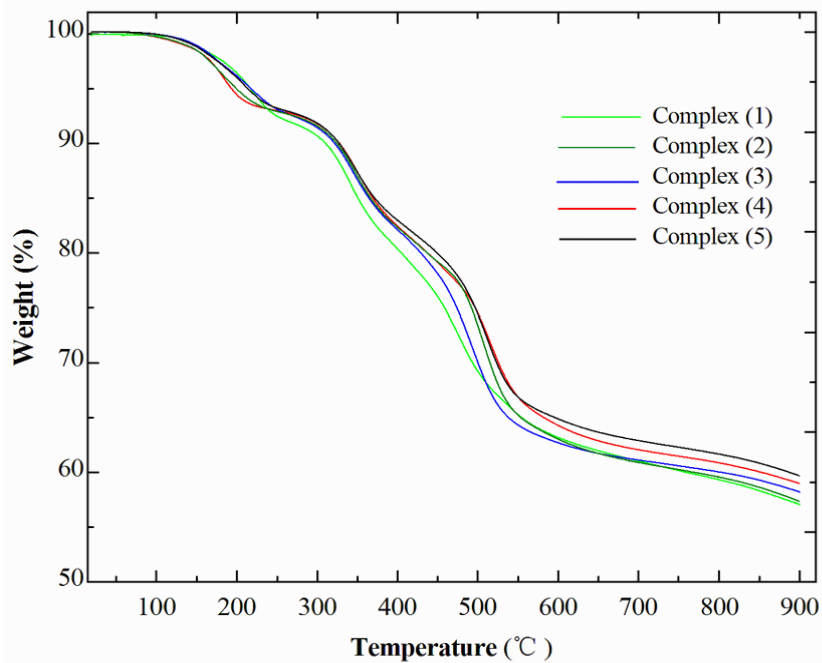

**Figure S8 (a).** The TGA diagrams of complexes **1**, **2**, **3**, **4** and **5**

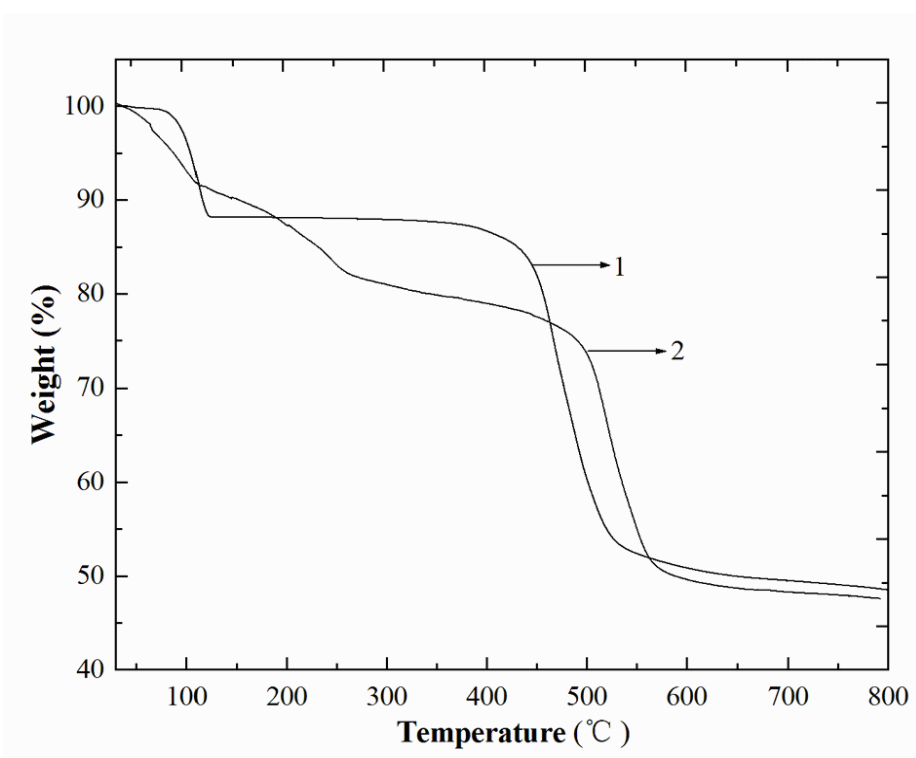

**Figure S8 (b).** The TGA diagrams of complexes **6** (1) and **7** (2)

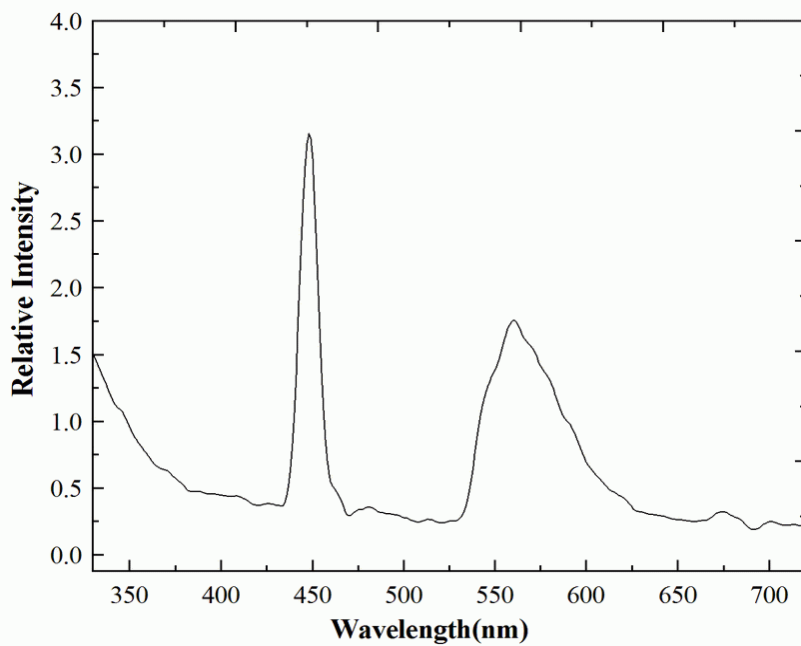

Figure S9 (a)

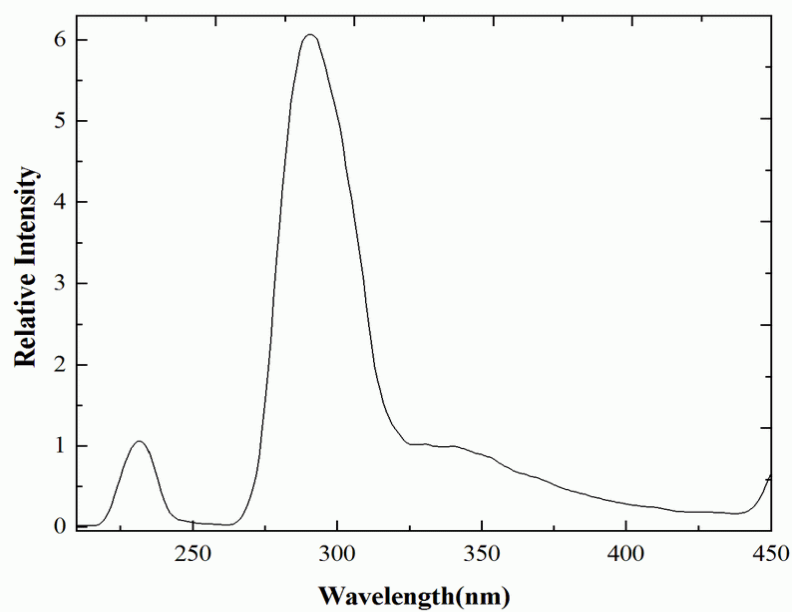

Figure S9 (b)

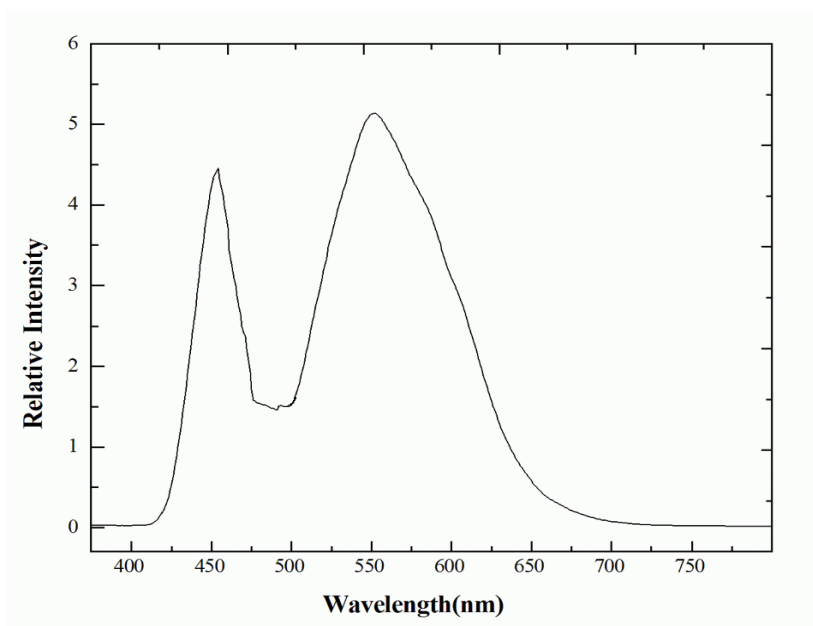

**Figure S9 (c)**

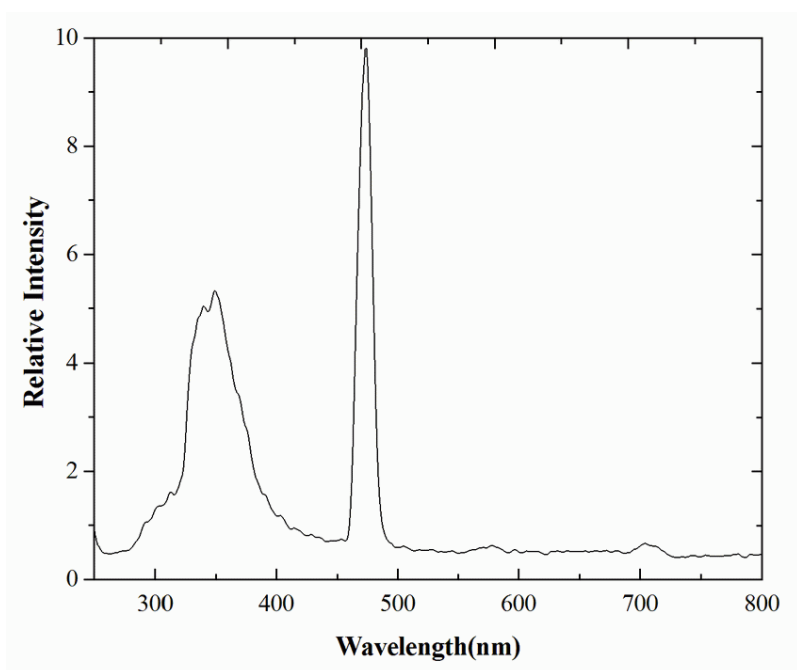

**Figure S9 (d)**

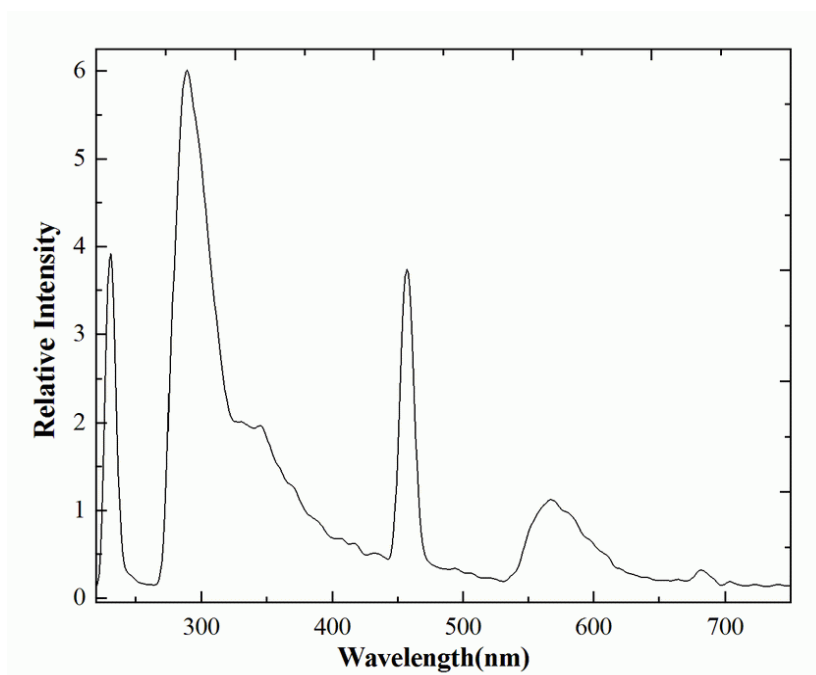

Figure S9 (e)

Figure S9. Photoemission spectra of the complexes **1Sm** (a), **3Gd** (b), **4Dy**(c), **5Ho** (d) and **6Ce** (e) in methanolic suspension state

## Magnetic Properties of the **1**

Fitting of the complex **1** based on  $\text{Sm}^{3+}$  ion and equation S1

(**1**) **Sm**. The  ${}^6\text{H}$  ground term for  $\text{Sm}(\text{II})$  is split by spin-orbit coupling into six levels. The energies,  $E(J)$ , increase from  ${}^6\text{H}_{5/2}$ , these energy is

$$E(J) = \lambda[J(J + 1) - 35/4]/2 \quad \text{eq (S1)}$$

The energy of the ground state is again taken as the origin. The spin-orbit coupling parameter is of the order of  $200 \text{ cm}^{-1}$ , such that the first excited state  ${}^6\text{H}_{7/2}$  can be populated at room temperature and above. The expression of the magnetic susceptibility taking into account the six states arising from  ${}^6\text{H}$  is:



$$\chi_M = \frac{\sum_{J=5/2}^{15/2} (2J+1)\chi(J) \exp[-E(J)/kT]}{\sum_{J=5/2}^{15/2} (2J+1) \exp[-E(J)/kT]}$$

with  $\chi(J)$  being given by eq 1 and  $E(J)$  by eq (S0).  $\chi_M$  may be expanded as:

$$\chi' = \frac{N\beta^2}{3kTx} \frac{a_1x + b_1 + (a_2x + b_2)e^{-7x/2} + (a_3x + b_3)e^{-8x} + (a_4x + b_4)e^{-27x/2} + (a_5x + b_5)e^{-20x} + (a_6x + b_6)e^{-55x/2}}{3 + 4e^{-7x/2} + 5e^{-8x} + 6e^{-27x/2} + 7e^{-20x} + 8e^{-55x/2}}$$

$$x = J / kT \quad \text{Eq (1)}$$

Parameters and value are as follow

$$a_1 = 2.143; b_1 = 7.347$$

$$a_2 = 42.92; b_2 = 1.641$$

$$a_3 = 283.7; b_3 = -0.6571$$

$$a_4 = 620.6; b_4 = -1.9400$$

$$a_5 = 1122; b_5 = -2.835$$

$$a_6 = 1813; b_6 = -3.556$$

Equation 2 was assigned as a molecular field approximation

$$\chi = \frac{\chi'}{1 - (2zj'/Ng^2\beta^2)\chi'} \quad \text{eq (2)}$$

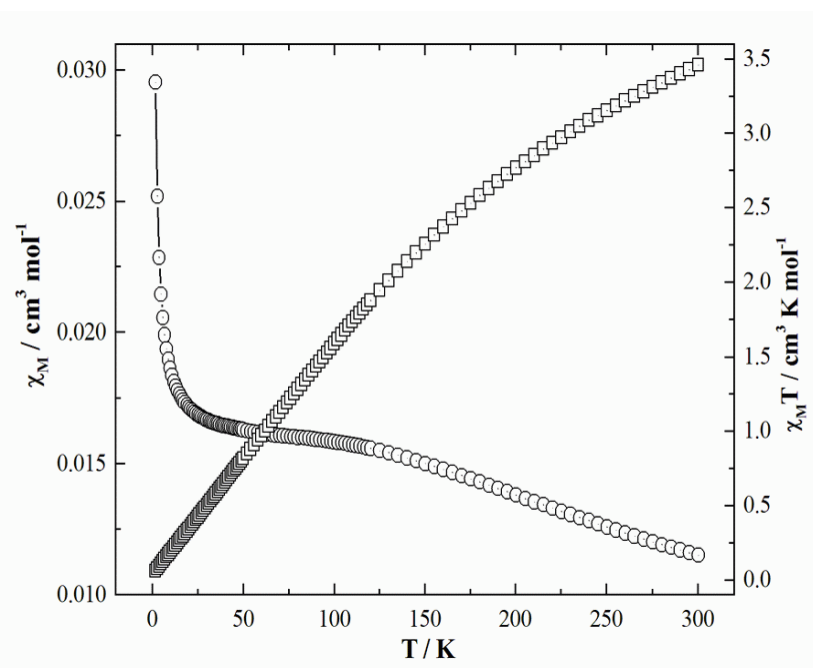

Figure. S10 (a)

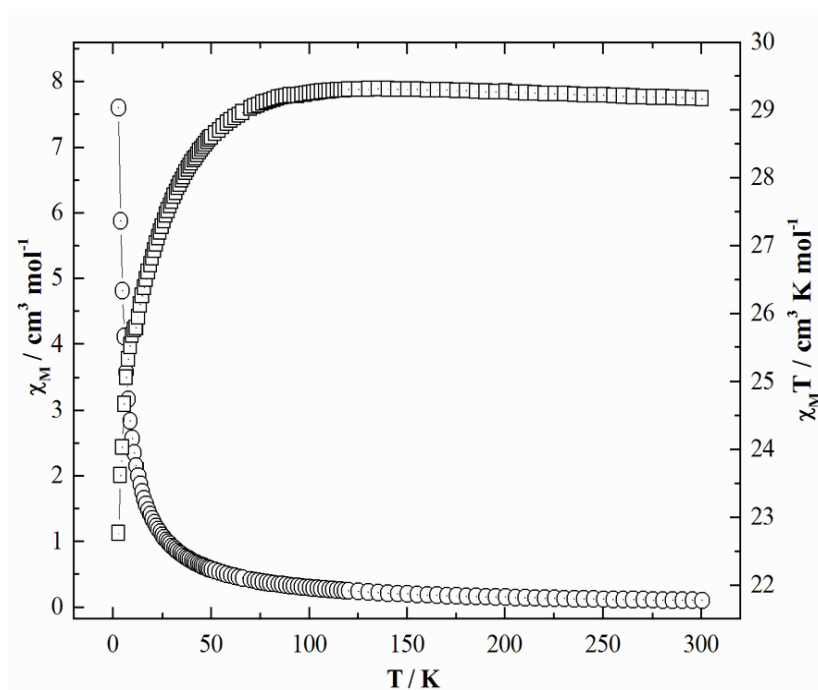

Figure. S10 (b)

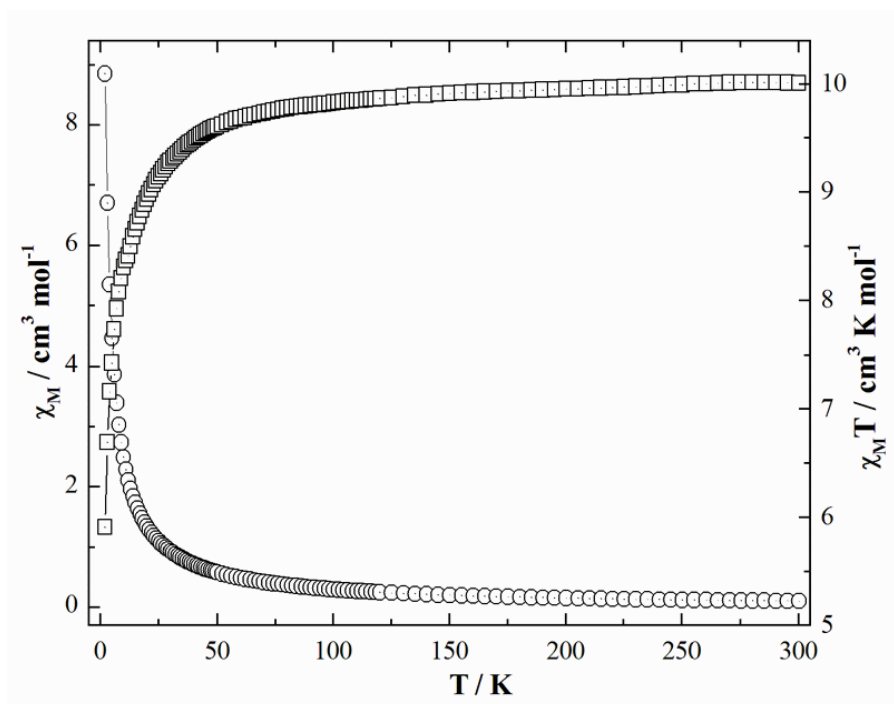

Figure. S10 (c)

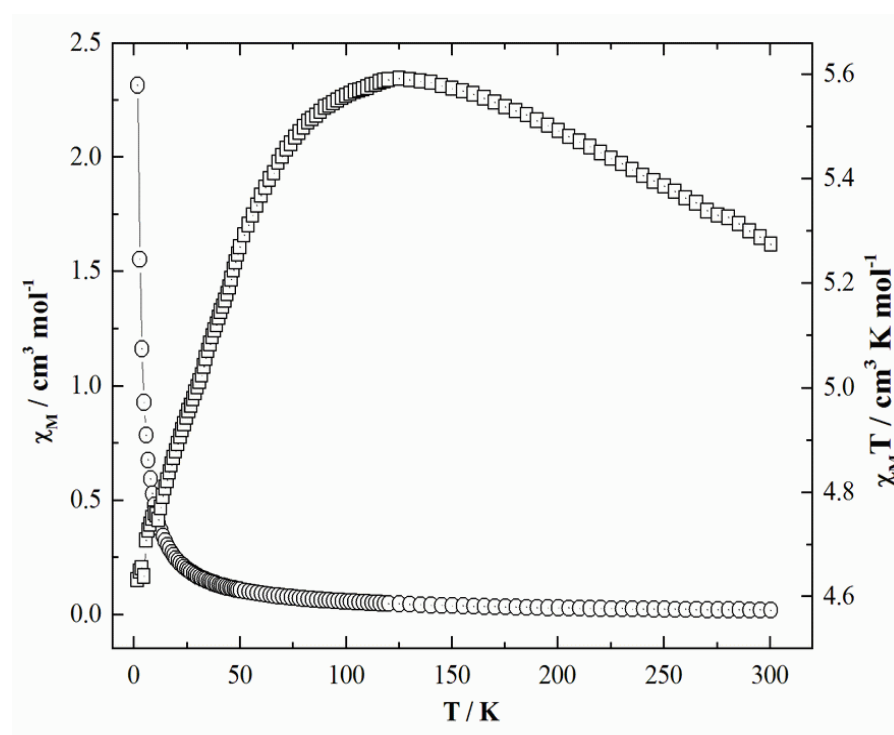

(d)

Figure. S10 .Temperature dependence of  $\chi_M T$  ( $\square$ ) and  $\chi_M$  (O) for **2**(a). **4**(b), **5**(c), **7**(d) between 2 and 300 K.

**Table S1** Selected bond lengths [Å] and angles [°] for complexes **1–7**

| Complex 1    |          |               |           |               |           |
|--------------|----------|---------------|-----------|---------------|-----------|
| Sm(1)-O(3)#2 | 2.331(3) | Sm(1)-N(3)    | 2.604(3)  | Sm(2)-O(11)#4 | 2.440(3)  |
| Sm(1)-O(2)#2 | 2.353(3) | Sm(1)-N(1)    | 2.620(3)  | Sm(2)-O(11)   | 2.440(3)  |
| Sm(1)-O(1)   | 2.387(3) | Sm(2)-O(6)#4  | 2.321(3)  | Sm(2)-O(9')#4 | 2.459(6)  |
| Sm(1)-O(8)#3 | 2.413(3) | Sm(2)-O(6)    | 2.321(3)  | O(2)-Sm(1)#5  | 2.353(3)  |
| Sm(1)-O(5)   | 2.432(3) | Sm(2)-O(7)#4  | 2.413(3)  | O(3)-Sm(1)#5  | 2.331(3)  |
| Sm(1)-O(10)  | 2.485(4) | Sm(2)-O(9)#4  | 2.417(8)  | O(8)-Sm(1)#6  | 2.413(3)  |
| Complex 2    |          |               |           |               |           |
| Eu(1)-O(3)#2 | 2.319(6) | Eu(1)-N(3)    | 2.583(8)  | Eu(2)-O(7)    | 2.404(6)  |
| Eu(1)-O(2)#2 | 2.352(6) | Eu(1)-N(1)    | 2.612(7)  | Eu(2)-O(9')#4 | 2.425(11) |
| Eu(1)-O(1)   | 2.369(6) | Eu(2)-O(6)#4  | 2.321(7)  | Eu(2)-O(11)#4 | 2.427(7)  |
| Eu(1)-O(8)#3 | 2.390(6) | Eu(2)-O(6)    | 2.321(7)  | Eu(2)-O(11)   | 2.427(7)  |
| Eu(1)-O(5)   | 2.424(6) | Eu(2)-O(9)#4  | 2.395(14) | O(2)-Eu(1)#5  | 2.352(6)  |
| Eu(1)-O(10)  | 2.468(8) | Eu(2)-O(7)#4  | 2.404(6)  | O(8)-Eu(1)#6  | 2.390(6)  |
| Complex 3    |          |               |           |               |           |
| O(9)-Gd(2)   | 2.445(5) | Gd(1)-N(3)    | 2.578(3)  | Gd(2)-O(11)#4 | 2.417(3)  |
| Gd(1)-O(3)#2 | 2.313(2) | Gd(1)-N(1)    | 2.596(3)  | Gd(2)-O(11)   | 2.417(3)  |
| Gd(1)-O(2)#2 | 2.347(2) | Gd(2)-O(6)#4  | 2.303(3)  | Gd(2)-O(9')#4 | 2.445(5)  |
| Gd(1)-O(1)   | 2.369(2) | Gd(2)-O(6)    | 2.303(3)  | O(1)-C(4)     | 1.276(4)  |
| Gd(1)-O(8)#3 | 2.392(2) | Gd(2)-O(7)    | 2.402(3)  | O(2)-C(4)     | 1.244(4)  |
| Gd(1)-O(5)   | 2.425(2) | Gd(2)-O(7)#4  | 2.402(3)  | O(2)-Gd(1)#5  | 2.347(2)  |
| Gd(1)-O(10)  | 2.454(3) | Gd(2)-O(9)#4  | 2.404(7)  | O(3)-Gd(1)#5  | 2.313(2)  |
| Complex 4    |          |               |           |               |           |
| O(9)-Dy(2)   | 2.365(7) | Dy(1)-O(10)   | 2.418(3)  | Dy(2)-O(7)    | 2.380(3)  |
| Dy(1)-O(3)#2 | 2.287(3) | Dy(1)-N(3)    | 2.554(3)  | O(8)-Dy(1)#6  | 2.370(3)  |
| Dy(1)-O(2)#2 | 2.320(3) | Dy(1)-N(1)    | 2.576(3)  | Dy(2)-O(9')#4 | 2.413(6)  |
| Dy(1)-O(1)   | 2.344(3) | Dy(2)-O(6)    | 2.280(3)  | O(3)-Dy(1)#5  | 2.287(3)  |
| Dy(1)-O(8)#3 | 2.370(3) | Dy(2)-O(9)#4  | 2.365(7)  | Dy(2)-O(7)#4  | 2.380(3)  |
| Dy(1)-O(5)   | 2.399(3) | Dy(2)-O(11)   | 2.379(3)  | O(2)-Dy(1)#5  | 2.320(3)  |
| Complex 5    |          |               |           |               |           |
| O(9)-Ho(2)   | 2.350(6) | Ho(1)-O(10)   | 2.390(3)  | Ho(2)-O(11)   | 2.369(3)  |
| O(9')-Ho(2)  | 2.387(5) | Ho(1)-N(3)    | 2.534(3)  | Ho(2)-O(7)#4  | 2.372(3)  |
| Ho(1)-O(3)#2 | 2.274(3) | Ho(1)-N(1)    | 2.561(3)  | Ho(2)-O(9')#4 | 2.387(5)  |
| Ho(1)-O(2)#2 | 2.315(3) | Ho(2)-O(6)    | 2.256(3)  | O(2)-Ho(1)#5  | 2.315(3)  |
| Ho(1)-O(1)   | 2.332(2) | Ho(2)-O(9)#4  | 2.350(6)  | O(3)-Ho(1)#5  | 2.274(3)  |
| Ho(1)-O(5)   | 2.390(3) | Ho(2)-O(11)#4 | 2.369(3)  | O(8)-Ho(1)#6  | 2.352(2)  |

| Complex 6    |          |               |          |               |          |
|--------------|----------|---------------|----------|---------------|----------|
| Ce(1)-O(3)#1 | 2.252(5) | Ce(1)-O(5)    | 2.354(5) | O(6)-Ce(1)#3  | 2.393(5) |
| Ce(1)-O(2)#1 | 2.295(5) | Ce(1)-O(6)#3  | 2.393(5) | O(2)-Ce(1)#4  | 2.295(5) |
| Ce(1)-O(4)#2 | 2.314(5) | Ce(1)-O(7)    | 2.395(6) | O(3)-Ce(1)#4  | 2.252(5) |
| Ce(1)-O(1)   | 2.326(5) | Ce(1)-N(1)    | 2.514(6) | O(4)-Ce(1)#5  | 2.314(5) |
| Complex 7    |          |               |          |               |          |
| Yb(1)-O(4)#1 | 2.298(5) | Yb(2)-O(15)   | 2.412(5) | Yb(2)-N(1)#3  | 2.538(5) |
| Yb(1)-O(14)  | 2.359(5) | Yb(2)-O(16)   | 2.415(5) | O(2)-Yb(2)#5  | 2.432(5) |
| Yb(1)-O(8)   | 2.365(5) | Yb(2)-O(7)    | 2.425(5) | O(3)-Yb(2)#5  | 2.432(5) |
| Yb(1)-O(1)   | 2.389(5) | Yb(2)-O(2)#3  | 2.432(5) | O(4)-Yb(1)#6  | 2.298(5) |
| Yb(1)-O(10)  | 2.406(5) | Yb(2)-O(3)#3  | 2.432(5) | O(9)-Yb(1)#2  | 2.458(5) |
| Yb(1)-O(5)   | 2.443(5) | Yb(2)-O(12)#4 | 2.453(5) | O(12)-Yb(2)#4 | 2.453(5) |
| Yb(1)-O(9)#2 | 2.458(5) | Yb(2)-O(11)   | 2.453(5) | N(1)-Yb(2)#5  | 2.538(5) |
| Yb(1)-O(13)  | 2.460(5) | Yb(2)-O(6)    | 2.533(5) |               |          |

Symmetry transformations used to generate equivalent atoms for **1**: #1 -x,-y+1,-z+1; #2 x,-y,z-1/2; #3 x,y-1,z; #4 -x,y,-z+3/2; #5 x,-y,z+1/2; #6 x, y+1,z. for **2** #1 -x,-y+1,-z+1; #2 x,-y,z-1/2; #3 x,y-1,z; #4 -x,y,-z+3/2; #5 x,-y,z+1/2; #6 x,y+1,z. **#7** -x+1/2,-y+1/2,-z+2. for **3** #1 -x,-y+1,-z+1; #2 x,-y, z-1/2; #3 x,y-1,z; #4 -x,y,-z+3/2; #5 x,-y,z+1/2; #6 x,y+1, z. for **4** #1 -x,-y+1,-z+1; #2 x,-y,z-1/2; #3 x,y-1,z #4 -x, y,-z+3/2. #5 x,-y,z+1/2; #6 x,y+1,z; #7 -x+1/2,-y+1/2,-z+2; #8 -x, y+1,-z+3/2. for **5** #1 -x,-y+1,-z+1; #2 x,-y,z-1/2; #3 x,y-1,z; #4 -x, y, -z+3/2; #5 x,-y,z+1/2; #6 x, y+1, z. #7 -x, y+1,-z+3/2. for **6** #1 x,-y+1/2,z-1/2; #2 -x+2,y-1/2, -z+1/2; #3 -x+3,-y,-z #4 x,-y+1/2,z+1/2; #5 -x+2, y+1/2, -z+1/2. for **7** #1 x+1,y+1,z; #2 -x+1,-y+2,-z; #3 x+1,y,z ; #4 -x+2,-y+1,-z+1; #5 x-1,y,z; #6 x-1,y-1, z.
